# Supplementary material for: COL1A1 and miR-29b show lower expression levels during osteoblast differentiation of bone marrow stromal cells from Osteogenesis Imperfecta patients
Source: PubMed Central journal article supplement (PMC4101867; doi:10.1186/1471-2350-15-45), 2014-04-27
Supplement: 1471-2350-15-45-S1.pdf [file 1471-2350-15-45-S1.pdf]

## Additional File 1 – Sequences of primers used for PCR, sequencing and qRT-PCR.

|                     | Sequence             |
|---------------------|----------------------|
| COL1A1-set1new-PF:  | CGGAGCAGACGGGAGTTTCT |
| COL1A1-set1new-PR:  | CCGAGTCTCCGGATCATCCA |
| COL1A1-set2new-PF:  | CGGGAAGTGAAAAATCCAAG |
| COL1A1-set2new-PR:  | GGAGAAGAAACAAGAGGCCA |
| COL1A1-set3new-PF:  | CTCCTGCCCTCGAATTTTGC |
| COL1A1-set3new-PR:  | GCACATGTCACAAACTGTGA |
| COL1A1-set4new-PF:  | CCAGGAAGTGCATGATGTCA |
| COL1A1-set4new-PR:  | GGTTAGAAGACAAGTCCCTG |
| COL1A1-set5new-PF:  | GGAGAGATGCTCAGAGATCT |
| COL1A1-set5new-PR:  | CCTTCCTCTGAGTATCGTTC |
| COL1A1-set6new-PF:  | CAAAGAAGACTGAGACCTT  |
| COL1A1-set6new-PR:  | GAGGTGCTTTTGGATGTCCA |
| COL1A1-set7new-PF:  | CCAAGGCTCTTCTCAGATC  |
| COL1A1-set7new-PR:  | GCTCCCATGTGCAGCCCAA  |
| COL1A1-set8new-PF:  | GGTTATGTTGGTCTGAACCC |
| COL1A1-set8new-PR:  | GTGGCACAGAGAAAGGAGTG |
| COL1A1-set9new-PF:  | CCCTTTGCCACTTTCTAACC |
| COL1A1-set9new-PR:  | GGCTCCTCTTCCTTTCTGGA |
| COL1A1-set10new-PF: | CAGGAACCCCTGACACTGGA |
| COL1A1-set10new-PR: | GCCTGATCCAGAACGCCTCA |
| COL1A1-set11new-PF: | TGAGGCGTTCTGGATCAGGC |
| COL1A1-set11new-PR: | CCAGGACTCCTTCAAGTCTC |
| COL1A1-set12new-PF: | CCACTCAGAGTAAATGAGAG |
| COL1A1-set12new-PR: | CCTCTAGTTGATGGCTGTCT |
| COL1A1-set13new-PF: | GGAAGGACCGTGCTTTCCAG |
| COL1A1-set13new-PR: | ATCTCCATGGCTTTGGTCAT |
| COL1A1-set14new-PF: | GGAAACAAGCCTGGGAGATA |
| COL1A1-set14new-PR: | CCAGAGAGAAGGAGAGATGC |
| COL1A1-set15new-PF: | GCAGAGGGCCTCTCAGGAAA |
| COL1A1-set15new-PR: | GGAGTCAGATTGGAGAGATG |
| COL1A1-set16new-PF: | GTACAGAAGACCTGTTAAGA |
| COL1A1-set16new-PR: | GAGAGCACAGAGGCATCAAG |
| COL1A1-set17new-PF: | TGAGTGGCTTGGCCCTCTGT |
| COL1A1-set17new-PR: | AGGTGCCAGAGAGCAGCACA |
| COL1A1-set18new-PF: | GTGCCAGCTCAGATCTCTGC |
| COL1A1-set18new-PR: | AGAGAGAGAGAAGTGAGAGT |
| COL1A1-set19new-PF: | CCTGGTGAATCTGGACGTGA |
| COL1A1-set19new-PR: | CCTGACATCTTGCAGGATCT |
| COL1A1-set20new-PF: | TTGGGAGAGATGGCCACAGT |
| COL1A1-set20new-PR: | CCATGCCCTTCATTATTCT  |
| COL1A1-set21new-PF: | AGAATAATGAAGGGGCATGG |
| COL1A1-set21new-PR: | GGATTACCGGCATCCAAGTG |
| COL1A1-set22new-PF: | GGCAAAGATGGACTCAACGG |
| COL1A1-set22new-PR: | TTGGGGTCAATCCAGTACTC |
| COL1A1-set23new-PF: | GCCACTCTGACTGGAAGAGT |
| COL1A1-set23new-PR: | CCCAATGCACCGTTATATCG |
| COL1A1-set24new-PF: | CGATATAACGGTGCATTGGG |

COL1A1-set24new-PR: GGAGGTCTTGGTGGTTTTGT  
COL1A1-set25new-PF: GCTTCACCTACAGCGTCACT  
COL1A1-set25new-PR: GGAGAAAGGAGCAGAAAGGG  
COL1A1-set26new-PF: CCAAAGTGCATTCAACCTT  
COL1A1-set26new-PR: CCATCACATAGATGTAGCAC  
COL1A1-set27new-PF: GGAGAGACTGTTCTGTTCCT  
COL1A1-set27new-PR: GGGTCATTTCCACATGCTTT

---

### Sequence

---

COL1A2-exon1-PF: CCTACAAGTGGCCTACAGGG  
COL1A2-exon1-PF: CCTCCCATCTAACCTCTCTA  
COL1A2-exon2-PF: GACCTGCATAATTTCTAGGT  
COL1A2-exon2-PR: TTCATAGAAGCTGATCCTAA  
COL1A2-exon3-PF: TTAGGATCAGCTTCTATGAA  
COL1A2-exon3-PR: CACCAGTTTGTATCACATAA  
COL1A2-exon4-PF: GCAGCTTCCAATCCTCCAGC  
COL1A2-exon4-PR: GGACTGTGGTGGTAGGTAGA  
COL1A2-exon5-PF: CCCTGTGATATCTTAAGAGT  
COL1A2-exon5-PR: CAGTGCACACAAAGACCAGT  
COL1A2-exon6-PF: GAGGTGTCGGCCAAGTTTTT  
COL1A2-exon6-PR: CCCAAGTTATGGTTACTATG  
COL1A2-exons7a9-PF: GGAATCAAACCACAACAATG  
COL1A2-exons7a9-PR: CCATACATTAAGAGTTCTGT  
COL1A2-exon10-PF: ACAGAACTCTTAATGTATGG  
COL1A2-exon10-PR: TCTAAGCACAGAGTGACAAA  
COL1A2-exon11-PF: TTTGTCACTCTGTGCTTAGA  
COL1A2-exon11-PR: CCCTAGATAGGTCACCTAAC  
COL1A2-exon12-PF: GCTGGGACCTGGAACACTGGACTTC  
COL1A2-exon12-PR: TGGAGGTCATGGGGAATTTCAATCA  
COL1A2-exons13a15-PF: CTGTGTGTCTGGCATAATTG  
COL1A2-exons13a15-PR: AATGAAGAAGACAGCACCCA  
COL1A2-exon16-PF: GTGTCATGCCACTGTAAGCA  
COL1A2-exon16-PR: CTCTCTGTGGTTGACTCTGG  
COL1A2-exon17-PF: CAGTAGCCAAGATGGCAGAATC  
COL1A2-exon17-PR: CCAGTAAGGCCGTTTGCTCCAG  
COL1A2-exon18-PF: CGTTGGACCTCCTGTAAGTAG  
COL1A2-exon18-PR: AAAATGCAGTGTGGTCCATTAGG  
COL1A2-exon19-PF: TAATGTGTGCTGCCTCTACAGC  
COL1A2-exon19-PR: CATATAGCAGACGGGAGTGTAC  
COL1A2-exon20-PF: CTTGAGCTTCTCTTTACCTTGAC  
COL1A2-exon20-PR: CACCACTGGGACCAGGAGGAC  
COL1A2-exon21-PF: CGTAAGTAGCTCTATCATCAC  
COL1A2-exon21-PR: AAGGCAGATGGAAAGCAGATG  
COL1A2-exons22a23-PF: GCAGGATGCTCATCTATGAA  
COL1A2-exons22a23-PR: CTGTCAGCAAGACTACTAAC  
COL1A2-exon24-PF: AAAAAGTCGGGGGAAAAGGTGCCTT  
COL1A2-exon24-PR: TCTCCCCTGCTCTGCTTTCAGTCCT  
COL1A2-exon25-PR: TCCCTGAGACTGGACTGATT  
COL1A2-exon26-PF: CCACAGACTAGGGATCTCAA  
COL1A2-exon26-PR: GCTACTACATATTCATACCC  
COL1A2-exons27a28-PF: CGTGGGAACCCACAATGAGT

COL1A2-exons27a28-PR: CCAAATATCAACATGAGCAC  
COL1A2-exon29-PF: GAGCTGTAAATCACCATACCGTAC  
COL1A2-exon29-PR: TGGCTCATTCTCTCCATCAGCAC  
COL1A2-exon30-PF: GCACTCATGTAGATACTGCC  
COL1A2-exon30-PR: GGCTTTGAACATCAACACAC  
COL1A2-exon31-PF: CTAGTGGAGAGATTAGGAAC  
COL1A2-exon31-PR: CCACTGGAATCGGATTGCTG  
COL1A2-exon32-PF: GCAGGCAAGAAGCCTGTCTA  
COL1A2-exon32-PR: CCTCATGTATTACTCAACAC  
COL1A2-exon33-PF: GAATGGTAAGGAATCGAGACATTGC  
COL1A2-exon33-PR:  
AATTTGGAAAATTCTCAATTCAACATAAAAAAAAAATCCAAGTACGAAG  
COL1A2-exon34-PF: CTCCTTCTGAGAGTGGCTTC  
COL1A2-exon34-PR: CCTGCTGCTCTATCACAATA  
COL1A2-exons35a37-PF: GTCAGTTATCTCTTCCAAGG  
COL1A2-exons35a37-PR: CCTGTTGCATAGCAGGCACT  
COL1A2-exon38-PF: GGTGGTAATATTGAAGAACA  
COL1A2-exon38-PR: GCTGATAGCAACATACTACTG  
COL1A2-exon39-PF: GGTCTATTCTGGTCACATG  
COL1A2-exon39-PR: ACTTCAGACCAGGAGAGTAA  
COL1A2-exon40-PF: CCAAATGGCCAGGGTATTAT  
COL1A2-exon40-PR: GGCTCAACTGAGCTCTACTT  
COL1A2-exon41-PF: GCCAAGATGTAACTCACCG  
COL1A2-exon41-PR: GCTGTGTCTTTATAGTGTGT  
COL1A2-exon42-PF: CCTTCTTCCTTCAAACCTAGA  
COL1A2-exon42-PR: CCATTCTTTGGCCTAAGCAA  
COL1A2-exons43a45-PF: GTGATGAAGACAGAGTAGCT  
COL1A2-exons43a45-PR: CAGATGTTTTGGACTGATTC  
COL1A2-exon46-PF: GTGAGAGCCTAGCTAAACCA  
COL1A2-exon46-PR: GCCAGAGAATGGGAAATGGA  
COL1A2-exons47a48-PF: GAGCCCCACTTTACATTTTC  
COL1A2-exons47a48-PR: GAGGATATATTGAAATGGGG  
COL1A2-exon49-PF: CTGATGAGAACATGCTTCCG  
COL1A2-exon49-PR: CATATTTAAGAGGAAGAGGG  
COL1A2-exon50-PF: CCCTCTTCCTCTTAAATATG  
COL1A2-exon50-PR: CCAATCAATCCATCTTCTAA  
COL1A2-exon51-PF: CCCTTTTCCTAAGCTTGGAT  
COL1A2-exon51-PR: GTTAGTTCTCTCATTCTTCT  
COL1A2-exon52.1-PF: GGGACAGACATCTTCAGAAT  
COL1A2-exon52.1-PR: GGAAAGTGTTTTGAGGTAGT  
COL1A2-exon52.2-PF: CAACACTCTTACACCTGTTA

---

**Sequence**

---

COL1A1-qRT-PF: CCTGGATGCCATCAAAGTCT  
COL1A1-qRT-PF: TCTTGTCTTGGGGTTCTTG
